# Supplementary material for: Salts, solvates and hydrates of the multi-kinase inhibitor drug pazopanib with hydroxybenzoic acids
Source: Royal Society of Chemistry journal article supplement (doi:10.1039/d1ce00785h), 2021-01-01
Supplement: d1ce00785h1.pdf [file d1ce00785h1.pdf]

## Electronic Supplementary Information, ESI

### Salts, Solvates and Hydrates of Multi-kinase Inhibitor Drug Pazopanib with Hydroxybenzoic Acids

Sunil K. Rai,<sup>\*,†</sup> Debjani Baidya,<sup>†</sup> and Ashwini K. Nangia<sup>\*,‡</sup>

<sup>†</sup> Division of Organic Chemistry, CSIR – National Chemical Laboratory, Dr. Homi Bhabha Road, Pune 411 008, India

<sup>‡</sup> School of Chemistry, University of Hyderabad, Prof. C. R. Rao Road, Gachibowli, Central University P.O., Hyderabad 500 046, India

**Table S1.** Hydrogen bonds in salts of Pazopanib.

| D–H···A       | H···A (Å) | D···A (Å)            | D–H···A (deg) | Symmetry code   |
|---------------|-----------|----------------------|---------------|-----------------|
|               |           | <b>PAZ</b>           |               |                 |
| N6–H3···N5    | 2.35      | 3.1413(2)            | 173           | -x,1-y,-z       |
| N7–H4A···O2   | 2.03      | 2.9061(2)            | 173           | 1-x,-y,-z       |
| N7–H4B···O1   | 2.00      | 2.8716(2)            | 168           | 2-x,-y,-z       |
| C13–H13···O2  | 2.53      | 3.3542(2)            | 145           | -x,1-y,-z       |
| C16–H16···N4  | 2.30      | 2.8845(2)            | 119           | Intra           |
| C20–H20···O2  | 2.38      | 2.8201(2)            | 108           | Intra           |
| C21–H21A···O1 | 2.30      | 3.0260(2)            | 130           | Intra           |
| C21–H21C···N2 | 2.58      | 3.4184(2)            | 144           | 1+x,-1+y,z      |
|               |           | <b>PAZ•THF</b>       |               |                 |
| N6–H6···N12   | 2.18      | 3.0406(13)           | 175           | 1-x,-y,-z       |
| N7–H7A···N2   | 2.11      | 2.9329(13)           | 154           | 1-x,-y,-z       |
| N7–H7B···O5   | 1.91      | 2.7985(12)           | 174           | 1-x,-y,-z       |
| N13–H13A···N5 | 2.18      | 3.0222(13)           | 167           | 1-x,-y,-z       |
| N14–H14A···N8 | 2.09      | 2.9552(13)           | 177           | -x,1-y,-z       |
| N14–H14B···O1 | 2.08      | 2.9337(13)           | 163           | 1-x,-y,-1-z     |
| C1–H1C···O4   | 2.49      | 3.3377(14)           | 147           | x,y,1+z         |
| C3–H3B···O2   | 2.52      | 3.4749(15)           | 176           | x,1+y,1+z       |
| C16–H16···N4  | 2.34      | 2.9292(13)           | 121           | Intra           |
| C20–H20···O2  | 2.38      | 2.8109(12)           | 108           | Intra           |
| C21–H21A···O1 | 2.59      | 2.9823(13)           | 105           | Intra           |
| C22–H22B···O3 | 2.41      | 3.2925(14)           | 152           | x,1+y,1+z       |
| C37–H37···N11 | 2.40      | 2.9384(13)           | 117           | Intra           |
| C41–H41···O3  | 2.34      | 2.7863(12)           | 109           | Intra           |
|               |           | <b>PAZ•2HBA•MeOH</b> |               |                 |
| N5–H5···O3    | 1.81      | 2.6518(5)            | 171           | 1/2-x,3/2-y,1-z |
| O5–H5B···O4   | 1.70      | 2.5402(5)            | 149           | Intra           |

|               |      |                                |     |                     |
|---------------|------|--------------------------------|-----|---------------------|
| N6-H6...O4    | 1.97 | 2.8252(6)                      | 170 | 1/2-x,3/2-y,1-z     |
| O6-H6B...N2   | 1.88 | 2.8084(6)                      | 161 | x,y,z               |
| N7-H7A...O3   | 2.05 | 2.8627(6)                      | 167 | x,y,z               |
| N7-H7B...O6   | 2.04 | 2.9658(6)                      | 174 | 1/2+x,1/2-y,1/2+z   |
| C2-H2C...O2   | 2.49 | 3.2491(7)                      | 135 | -1/2+x,3/2-y,-1/2+z |
| C5-H5A...O2   | 2.46 | 3.2897(7)                      | 148 | 1/2-x,1/2+y,1/2-z   |
| C10-H10A...O4 | 2.59 | 3.4064(7)                      | 143 | x,y,z               |
| C16-H16...O1  | 2.40 | 2.8275(6)                      | 108 | Intra               |
| C16-H16...N4  | 2.32 | 2.9230(6)                      | 122 | Intra               |
| C21-H21C...O2 | 2.37 | 2.9731(6)                      | 120 | Intra               |
|               |      | <b>PAZ•4HBA•H<sub>2</sub>O</b> |     |                     |
| N5-H3...O4    | 1.85 | 2.6904(2)                      | 169 | 1-x,-y,-z           |
| N6-H4...O3    | 1.79 | 2.7204(2)                      | 175 | 1-x,-y,-z           |
| O5-H5...O4    | 1.95 | 2.6640(2)                      | 167 | 1-x,1/2+y,1/2-z     |
| N7-H7A...N2   | 2.09 | 2.9192(2)                      | 170 | 1-x,-1/2+y,1/2-z    |
| N7-H7B...O5   | 2.17 | 3.0893(2)                      | 170 | 1-x,-1/2+y,1/2-z    |
| O6-H9A...O1   | 2.20 | 2.9321(2)                      | 170 | -1+x,y,z            |
| O6-H9B...N2   | 2.30 | 3.0501(2)                      | 178 | x,y,z               |
| C1-H1B...O2   | 2.57 | 3.4969(3)                      | 155 | -1+x,1+y,z          |
| C2-H2A...O6   | 2.49 | 3.3345(2)                      | 144 | -x,1-y,-z           |
| C2-H2B...O2   | 2.56 | 3.4565(3)                      | 152 | -1+x,1+y,z          |
| C12-H12...O2  | 2.50 | 3.2318(2)                      | 134 | 1-x,-y,-z           |
| C15-H15...N4  | 2.34 | 2.9340(2)                      | 120 | Intra               |
| C19-H19...O2  | 2.35 | 2.7940(2)                      | 108 | Intra               |
| C20-H20A...O1 | 2.26 | 3.0294(2)                      | 134 | Intra               |
|               |      | <b>PAZ•23HBA</b>               |     |                     |
| N5-H3...O5    | 2.05 | 2.9067(6)                      | 166 | -1+x,y,z            |
| O7-H18...O4   | 1.68 | 2.5201(5)                      | 152 | Intra               |
| N5-H26...O6   | 2.39 | 3.0942(6)                      | 139 | x,y,z               |
| N5-H26...O7   | 2.26 | 3.0453(6)                      | 151 | x,y,z               |
| N3-H27...O5   | 1.95 | 2.8186(5)                      | 170 | 2-x,1-y,-z          |
| N4-H28...O4   | 1.82 | 2.7197(5)                      | 177 | 2-x,1-y,-z          |
| O6-H29...N6   | 1.83 | 2.7075(5)                      | 163 | 1-x,1-y,1-z         |
| C15-H4...N2   | 2.37 | 2.9624(6)                      | 121 | Intra               |
| C15-H4...N5   | 2.58 | 3.0110(6)                      | 109 | Intra               |
| C13-H7...O2   | 2.54 | 3.1901(6)                      | 125 | -x,2-y,-z           |
| C16-H9...O3   | 2.50 | 3.2648(6)                      | 140 | 1+x,-1+y,z          |
| C23-H22...O7  | 2.49 | 3.4197(7)                      | 163 | x,y,z               |
|               |      | <b>PAZ•24HBA•EtOH</b>          |     |                     |
| N5-H3...O4    | 1.78 | 2.6835(2)                      | 171 | -x,1-y,-z           |
| N6-H4...O3    | 1.98 | 2.8503(3)                      | 171 | -x,1-y,-z           |
| O5-H5...O3    | 1.72 | 2.5779(2)                      | 151 | Intra               |

|               |      |                                  |     |                  |
|---------------|------|----------------------------------|-----|------------------|
| N7-H7A...O7   | 1.92 | 2.8235(3)                        | 167 | -1/2+x,1/2-y,-z  |
| N7-H7B...O6   | 1.96 | 2.8691(3)                        | 172 | -1/2+x,1/2-y,-z  |
| O6-H10...O4   | 1.71 | 2.6089(2)                        | 169 | 1/2+x,1/2-y,-z   |
| O7-H14...N2   | 1.85 | 2.7922(3)                        | 164 | x,y,z            |
| C12-H12...O1  | 2.48 | 3.1317(3)                        | 126 | -x,1-y,-z        |
| C15-H15...N4  | 2.35 | 2.9405(3)                        | 120 | Intra            |
| C19-H19...O1  | 2.39 | 2.8216(3)                        | 108 | Intra            |
| C19-H19...O3  | 2.56 | 3.3253(3)                        | 137 | -x,1-y,-z        |
| C20-H20A...O2 | 2.44 | 3.1550(3)                        | 129 | Intra            |
| C20-H20A...N7 | 2.52 | 3.1670(3)                        | 123 | Intra            |
|               |      | <b>PAZ•25HBA•4H<sub>2</sub>O</b> |     |                  |
| N5-H5...O4    | 1.66 | 2.6067(7)                        | 173 | -x,1-y,1-z       |
| O5-H5A...O3   | 1.62 | 2.5893(7)                        | 149 | Intra            |
| N6-H6...O3    | 1.93 | 2.8241(8)                        | 176 | -x,1-y,1-z       |
| O6-H6B...O2   | 1.94 | 2.9285(8)                        | 166 | x,y,z            |
| N7-H7A...O4   | 2.02 | 2.8599(8)                        | 163 | 1+x,y,z          |
| N7-H7B...O9   | 2.21 | 2.9901(8)                        | 159 | 1+x,y,z          |
| O7-H7C...N1   | 1.97 | 2.8855(8)                        | 177 | x,y,-1+z         |
| O7-H7D...O2   | 1.98 | 2.8409(8)                        | 176 | x,y,z            |
| O8-H8A...O10  | 1.84 | 2.7744(8)                        | 168 | x,y,z            |
| O8-H8B...O7   | 2.01 | 2.8260(8)                        | 169 | 1-x,1-y,-z       |
| O9-H9A...N1   | 2.06 | 2.9698(8)                        | 172 | x,y,-1+z         |
| O9-H9B...O8   | 1.69 | 2.7847(8)                        | 170 | -x,1-y,-z        |
| O10-H10D...O9 | 2.00 | 2.7720(8)                        | 177 | x,y,z            |
| O10-H10E...O7 | 2.31 | 3.0618(9)                        | 141 | x,y,z            |
| C10-H10A...O6 | 2.46 | 3.3219(9)                        | 150 | 1-x,-y,1-z       |
| C16-H16...O3  | 2.60 | 3.3462(9)                        | 138 | -x,1-y,1-z       |
| C20-H20...O1  | 2.40 | 2.8236(8)                        | 108 | Intra            |
| C20-H20...N4  | 2.31 | 2.9107(8)                        | 122 | Intra            |
| C21-H21A...O9 | 2.51 | 3.3260(9)                        | 142 | 1+x,y,z          |
| C21-H21A...N7 | 2.48 | 3.2110(9)                        | 133 | Intra            |
| C26-H26...O1  | 2.50 | 3.3100(9)                        | 145 | 1-x,-y,1-z       |
| C28-H28...O4  | 2.46 | 2.7709(8)                        | 100 | Intra            |
|               |      | <b>PAZ•26HBA</b>                 |     |                  |
| N5-H3...O3    | 1.80 | 2.7344(1)                        | 172 | -1+x,y,1+z       |
| N6-H4...O4    | 1.87 | 2.7992(1)                        | 174 | -1+x,y,1+z       |
| O5-H5...O3    | 1.67 | 2.5259(1)                        | 159 | Intra            |
| N7-H7A...O5   | 2.04 | 2.9165(1)                        | 167 | 2-x,-y,1-z       |
| N7-H7B...N2   | 2.30 | 3.0919(1)                        | 147 | 2-x,-1/2+y,3/2-z |
| O6-H10...O4   | 1.65 | 2.5289(1)                        | 157 | Intra            |
| C1-H1C...O6   | 2.49 | 3.1344(1)                        | 123 | 2-x,1/2+y,1/2-z  |
| C2-H2C...N7   | 2.41 | 3.3376(1)                        | 158 | 2-x,-y,1-z       |

|               |      |                                      |     |                 |
|---------------|------|--------------------------------------|-----|-----------------|
| C6-H6...O6    | 2.32 | 3.2381(1)                            | 163 | 2-x,-y,1-z      |
| C12-H12...O2  | 2.40 | 3.1669(1)                            | 137 | 1-x,1/2+y,3/2-z |
| C15-H15...O1  | 2.40 | 2.8243(1)                            | 107 | Intra           |
| C15-H15...N4  | 2.34 | 2.9315(1)                            | 120 | Intra           |
| C19-H19...O4  | 2.59 | 3.3459(1)                            | 135 | -1+x,y,1+z      |
| C20-H20A...O2 | 2.29 | 3.0217(1)                            | 130 | Intra           |
|               |      | <b>PAZ•35HBA•MeOH•H<sub>2</sub>O</b> |     |                 |
| N5-H5...O4    | 1.70 | 2.6239(2)                            | 169 | 1-x,1-y,1-z     |
| O5-H5A...O7   | 1.75 | 2.6667(2)                            | 163 | -x,-1/2+y,1/2-z |
| N6-H6...O3    | 2.00 | 2.8737(2)                            | 176 | 1-x,1-y,1-z     |
| O6-H6B...O8   | 1.78 | 2.6497(2)                            | 175 | x,-1+y,z        |
| O7-H7...O3    | 1.78 | 2.7303(2)                            | 169 | x,y,z           |
| N7-H7A...O2   | 2.12 | 2.8883(2)                            | 148 | 1-x,1/2+y,1/2-z |
| N7-H7B...O4   | 1.95 | 2.7940(2)                            | 168 | x,y,z           |
| O8-H8A...N2   | 1.82 | 2.7722(2)                            | 179 | -x,1/2+y,1/2-z  |
| C2-H2A...O5   | 2.56 | 3.3503(2)                            | 137 | -x,-y,1-z       |
| C2-H2C...O7   | 2.48 | 3.4074(2)                            | 158 | -x,1-y,1-z      |
| C12-H12...O2  | 2.47 | 3.3663(2)                            | 157 | x,1/2-y,1/2+z   |
| C15-H15...O1  | 2.40 | 2.8329(2)                            | 107 | Intra           |
| C15-H15...N4  | 2.27 | 2.8623(2)                            | 119 | Intra           |
| C20-H20A...O2 | 2.21 | 2.9475(2)                            | 131 | Intra           |
| C26-H26...O8  | 2.52 | 3.1955(2)                            | 128 | x,-1+y,z        |
|               |      | <b>PAZ•CFA•CH<sub>3</sub>CN</b>      |     |                 |
| N6-H1...O3    | 2.09 | 2.9052(3)                            | 176 | 1-x,1-y,1-z     |
| N5-H2...O4    | 1.64 | 2.5923(3)                            | 174 | 1-x,1-y,1-z     |
| O5-H3...O6    | 2.37 | 2.7583(3)                            | 106 | Intra           |
| O5-H3...N2    | 1.93 | 2.7838(3)                            | 157 | -x,-1/2+y,1/2-z |
| N7-H7A...O4   | 2.00 | 2.8074(3)                            | 174 | x,y,z           |
| N7-H7B...O2   | 2.24 | 3.0116(3)                            | 148 | 1-x,1/2+y,1/2-z |
| O6-H14...O3   | 1.87 | 2.7305(3)                            | 171 | -x,-1/2+y,1/2-z |
| C1-H1A...O5   | 2.49 | 3.3162(4)                            | 142 | -x,1/2+y,1/2-z  |
| C2-H2C...N8   | 2.58 | 3.5581(4)                            | 176 | x,1/2-y,1/2+z   |
| C8-H8...O6    | 2.35 | 3.1528(3)                            | 142 | -x,1/2+y,1/2-z  |
| C12-H12...O2  | 2.39 | 3.3357(4)                            | 174 | x,1/2-y,1/2+z   |
| C19-H19...O1  | 2.41 | 2.8386(3)                            | 107 | Intra           |
| C19-H19...N4  | 2.30 | 2.9073(3)                            | 121 | Intra           |
| C21-H21C...O2 | 2.54 | 2.9616(3)                            | 106 | Intra           |
| C31-H31B...O1 | 2.51 | 3.3756(4)                            | 147 | x,1+y,z         |

**Table S2.** Calculated and observed weight loss in TGA of selected PAZ salts (see Figure 13).

| Salt                                   | Calc. mol. weight                                                                     | Calc. weight loss of fragments                                        | Obs. weight loss                | Comments                                        |
|----------------------------------------|---------------------------------------------------------------------------------------|-----------------------------------------------------------------------|---------------------------------|-------------------------------------------------|
| <b>PAZ•24DHBA•EtOH</b>                 | PAZ 437.52<br>24DHBA 154.12<br>EtOH 46.07<br>Total 637.71                             | 24DHBA 24.17%<br>EtOH 7.22%<br>Total = 31.39%                         | 28% at 220 °C<br>in Fig. 13e    | Mainly loss of conformer 24DHBA                 |
| <b>PAZ•35DHBA•MeOH•H<sub>2</sub>O:</b> | PAZ 437.52<br>35DHBA 154.12<br>MeOH 32.04<br>H <sub>2</sub> O = 18.02<br>Total 641.70 | 35DHBA 24.02%<br>MeOH 5.00%<br>H <sub>2</sub> O 2.81%<br>Total 31.83% | 32% up to 300 °C<br>In Fig. 13h | Coformer 35DHBA and volatile solvent/water loss |
| <b>PAZ•CFA•CH<sub>3</sub>CN:</b>       | PAZ 437.52<br>CFA 180.16<br>CH <sub>3</sub> CN 41.05<br>Total 658.73                  | CFA 27.35<br>CH <sub>3</sub> CN 6.23<br>Total 33.58                   | 12% at 210 °C<br>In Fig. 13h    | Loss of volatile solvent                        |

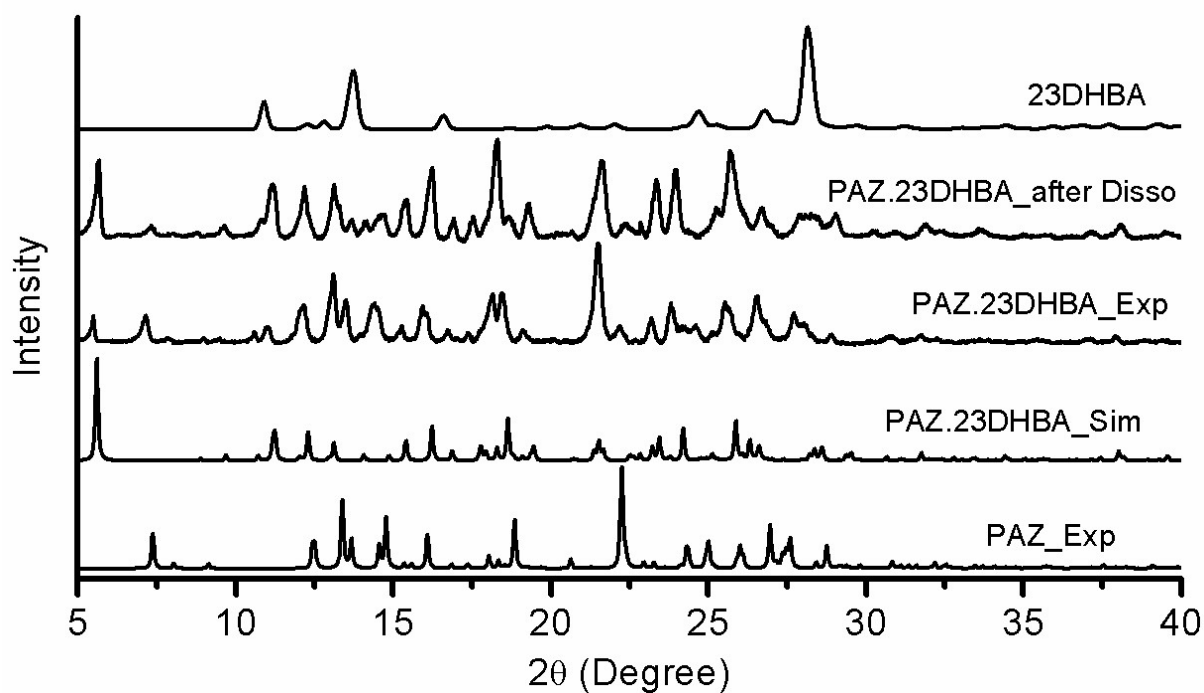

(a)

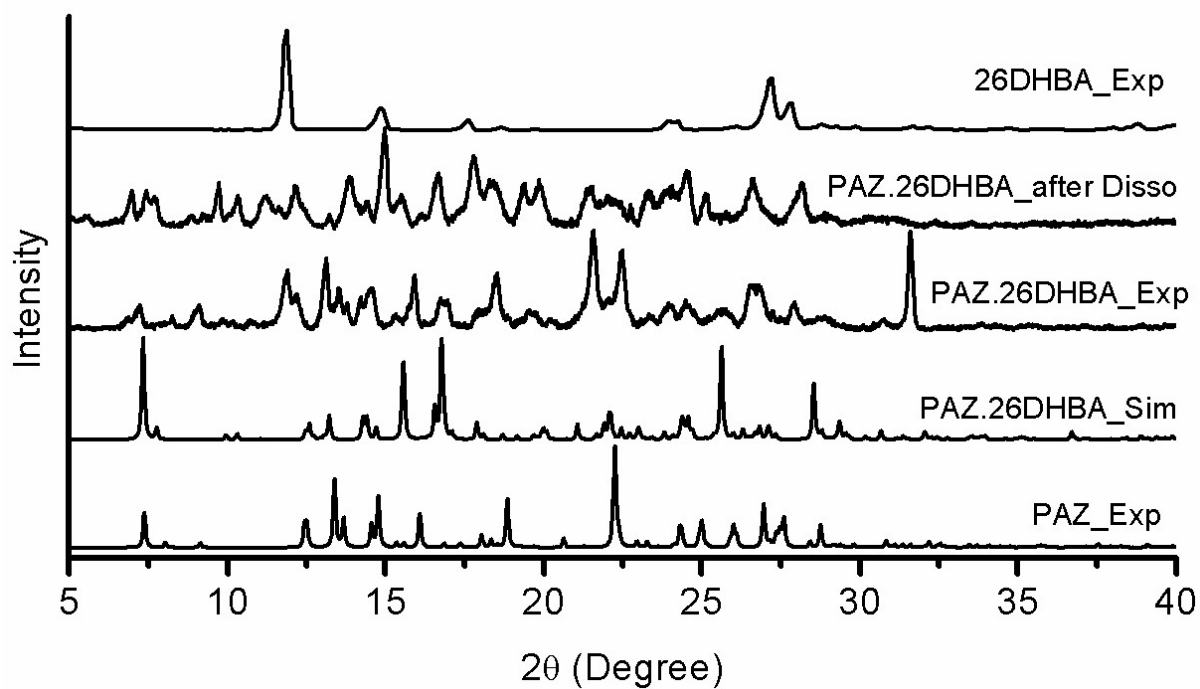

(b)

**Figure S1.** Powder X-ray diffraction line profile of PAZ, DHBA cofomer, and product salt to match with the single crystal X-ray structure and absence of starting components. (a) PAZ.23DHBA, (b) PAZ.26DHBA.
